# Supplementary material for: The Dynamic Changes of Gut Microbiota in Muc2 Deficient Mice
Source: PubMed Central journal article supplement (PMC6164417; doi:10.3390/ijms19092809), 2018-09-18
Supplement: ijms-19-02809-s001.pdf [file ijms-19-02809-s001.pdf]

**Supplementary Table 1. Genera that differed significantly between *Muc2*<sup>-/-</sup> and <sup>+/+</sup> mice**

| Time           | Phylum         | Genus                                                 | Relative abundance (%)                  |                            | p-value        | Directions of change |   |
|----------------|----------------|-------------------------------------------------------|-----------------------------------------|----------------------------|----------------|----------------------|---|
|                |                |                                                       | <i>Muc2</i> <sup>+/+</sup>              | <i>Muc2</i> <sup>-/-</sup> |                |                      |   |
| Day 48         | Bacteroidetes  | <i>Odoribacter</i>                                    | 1.24 ± 0.57                             | 0.041 ± 0.014              | 0.02175        | ↓                    |   |
|                | Firmicutes     | <i>Turicibacter</i>                                   | 0.0038 ± 0.00065                        | 0.12 ± 0.052               | 0.01769        | ↑                    |   |
|                | Firmicutes     | [ <i>Eubacterium</i> ] <i>brachy</i> group            | 0.011 ± 0.0076                          | 0.045 ± 0.0086             | 0.007038       | ↑                    |   |
|                | Firmicutes     | Family XIII AD3011 group                              | 0.0012 ± 0.0021                         | 0.046 ± 0.026              | 0.04113        | ↑                    |   |
|                | Proteobacteria | <i>Desulfovibrio</i>                                  | 0.00047 ± 0.00035                       | 0.0080 ± 0.0019            | 0.03126        | ↑                    |   |
|                | Proteobacteria | <i>Escherichia</i>                                    | 0.010 ± 0.0061                          | 0                          | 0.001869       | ↓                    |   |
| Day 98         | Firmicutes     | <i>Ruminococcaceae</i> UCG-014                        | 0.6141 ± 0.42                           | 4.75 ± 0.86                | 0.001718       | ↓                    |   |
|                | Firmicutes     | uncultured_f_Ruminococcaceae                          | 1.38 ± 0.20                             | 0.59 ± 0.13                | 0.004471       | ↓                    |   |
|                | Proteobacteria | <i>Parasutterella</i>                                 | 0.57 ± 0.15                             | 0.060 ± 0.029              | 0.004093       | ↓                    |   |
|                | Firmicutes     | <i>Ruminococcaceae</i> UCG-013                        | 0.40 ± 0.16                             | 0.080 ± 0.048              | 0.03257        | ↓                    |   |
|                | Firmicutes     | norank_f_Clostridiales_vadin BB60 group               | 0.28 ± 0.12                             | 0.045 ± 0.028              | 0.02807        | ↓                    |   |
|                | Firmicutes     | <i>Lachnospiraceae</i> UCG-008                        | 0.0089 ± 0.0043                         | 0                          | 0.02312        | ↓                    |   |
|                | Firmicutes     | <i>Butyrivibrio</i>                                   | 0.0013 ± 0.00026                        | 1.23 ± 0.46                | 0.01017        | ↑                    |   |
|                | Firmicutes     | <i>Blautia</i>                                        | 0.015 ± 0.011                           | 1.02 ± 0.55                | 0.03343        | ↑                    |   |
|                | Firmicutes     | <i>Lachnospiraceae</i> UCG-008                        | 0.31 ± 0.022                            | 0.63 ± 0.17                | 0.03047        | ↑                    |   |
|                | Firmicutes     | <i>Romboutsia</i>                                     | 0.0063 ± 0.0043                         | 0.87 ± 0.46                | 0.03042        | ↑                    |   |
|                | Bacteroidetes  | <i>Parabacteroides</i>                                | 0.15 ± 0.096                            | 0.50 ± 0.16                | 0.0319         | ↑                    |   |
|                | Firmicutes     | <i>Lachnospiraceae</i> UCG-010                        | 0                                       | 0.65 ± 0.18                | 0.003141       | ↑                    |   |
|                | Firmicutes     | <i>Clostridium sensu stricto 1</i>                    | 0                                       | 0.50 ± 0.28                | 0.03646        | ↑                    |   |
|                | Proteobacteria | <i>Sutterella</i>                                     | 0.094 ± 0.067                           | 0.38 ± 0.15                | 0.03902        | ↑                    |   |
|                | Firmicutes     | Family XIII AD3011 group                              | 0.0064 ± 0.0058                         | 0.21 ± 0.076               | 0.01006        | ↑                    |   |
|                | Cyanobacteria  | norank_o_Gastranaerophilales                          | 0.020 ± 0.017                           | 0.18 ± 0.091               | 0.04057        | ↑                    |   |
|                | Firmicutes     | <i>Christensenellaceae</i> R-7 group                  | 0.019 ± 0.0073                          | 0.076 ± 0.034              | 0.04786        | ↑                    |   |
|                | Firmicutes     | [ <i>Ruminococcus</i> ] <i>gavreaii</i> group         | 0                                       | 0.081 ± 0.032              | 0.01197        | ↑                    |   |
|                | Firmicutes     | <i>Anaerovorax</i>                                    | 0.011 ± 0.0038                          | 0.062 ± 0.022              | 0.01706        | ↑                    |   |
|                | Firmicutes     | <i>Erysipelotrichaceae</i> UCG-003                    | 0.0013 ± 0.00023                        | 0.043 ± 0.013              | 0.005516       | ↑                    |   |
|                | Proteobacteria | <i>Desulfovibrio</i>                                  | 0.00012 ± 0.00009                       | 0.013 ± 0.0057             | 0.006591       | ↑                    |   |
|                | Firmicutes     | <i>Dorea</i>                                          | 0.0038 ± 0.0018                         | 0.022 ± 0.006              | 0.009755       | ↑                    |   |
|                | Proteobacteria | <i>Escherichia</i>                                    | 0.00034 ± 0.00020                       | 0.0015 ± 0.0011            | 0.03541        | ↑                    |   |
|                | Firmicutes     | <i>Gemella</i>                                        | 0                                       | 0.0091 ± 0.0011            | 0.000155       | ↑                    |   |
|                | Firmicutes     | <i>Ruminococcaceae</i> UCG-007                        | 0                                       | 0.0062 ± 0.0032            | 0.02915        | ↑                    |   |
|                | Firmicutes     | <i>Turicibacter</i>                                   | 0                                       | 0.057 ± 0.0098             | 0.007134       | ↑                    |   |
|                | Verucomicrobia | <i>Akkermansia</i>                                    | 0                                       | 0.00095 ± 0.00037          | 0.04312        | ↑                    |   |
|                | Day 118        | Bacteroidetes                                         | norank_f_Bacteroidales_S24-7 group      | 62.85 ± 13.96              | 35.30 ± 4.45   | 0.0312               | ↓ |
|                |                | Proteobacteria                                        | <i>Parasutterella</i>                   | 1.61 ± 0.30                | 0.056 ± 0.040  | 0.0008906            | ↓ |
|                |                | Firmicutes                                            | norank_f_Clostridiales_vadin BB60 group | 0.22 ± 0.058               | 0.059 ± 0.0076 | 0.009176             | ↓ |
| Actinobacteria |                | <i>Coriobacteriaceae</i> UCG-002                      | 0.089 ± 0.029                           | 0.0027 ± 0.0047            | 0.007522       | ↓                    |   |
| Tenericutes    |                | <i>Ureaplasma</i>                                     | 0.0083 ± 0.0040                         | 0                          | 0.02443        | ↓                    |   |
| Proteobacteria |                | <i>Desulfovibrio</i>                                  | 0.0071 ± 0.0033                         | 0.015 ± 0.0021             | 0.007534       | ↑                    |   |
| Firmicutes     |                | <i>Ruminococcaceae</i> UCG-014                        | 0.51 ± 0.099                            | 6.37 ± 0.98                | 0.001385       | ↑                    |   |
| Firmicutes     |                | Unclassified_f_Lachnospiraceae                        | 2.20 ± 1.80                             | 8.51 ± 1.64                | 0.01096        | ↑                    |   |
| Firmicutes     |                | [ <i>Eubacterium</i> ] <i>coprostanoligenes</i> group | 0.020 ± 0.0030                          | 3.64 ± 1.09                | 0.004533       | ↑                    |   |
| Firmicutes     |                | <i>Ruminococcus 1</i>                                 | 0.010 ± 0.0071                          | 2.98 ± 1.47                | 0.02493        | ↑                    |   |
| Bacteroidetes  |                | <i>Alloprevotella</i>                                 | 0.066 ± 0.0068                          | 1.36 ± 0.22                | 0.0006536      | ↑                    |   |
| Firmicutes     |                | <i>Anaerotruncus</i>                                  | 0.13 ± 0.060                            | 0.83 ± 0.22                | 0.005963       | ↑                    |   |
| Bacteroidetes  |                | <i>Parabacteroides</i>                                | 0.11 ± 0.033                            | 0.60 ± 0.29                | 0.04347        | ↑                    |   |
| Firmicutes     |                | <i>Blautia</i>                                        | 0.050 ± 0.044                           | 0.51 ± 0.25                | 0.03642        | ↑                    |   |

|            |                     |                                                |                    |                   |          |   |
|------------|---------------------|------------------------------------------------|--------------------|-------------------|----------|---|
|            | Firmicutes          | <i>[Eubacterium] nodatum group</i>             | 0.085 ± 0.079      | 0.37 ± 0.093      | 0.0151   | ↑ |
|            | Firmicutes          | <i>Lachnospiraceae UCG-010</i>                 | 0                  | 0.38 ± 0.15       | 0.01046  | ↑ |
|            | Firmicutes          | <i>[Eubacterium] brachy group</i>              | 0.036 ± 0.013      | 0.11 ± 0.034      | 0.02611  | ↑ |
|            | Proteobacteria      | <i>Escherichia</i>                             | 0.00014 ± 0.000098 | 0.0018 ± 0.00079  | 0.04519  | ↑ |
|            | Firmicutes          | <i>Ruminococcus 2</i>                          | 0                  | 0.063 ± 0.08      | 0.04799  | ↑ |
|            | Firmicutes          | <i>Dorea</i>                                   | 0                  | 0.038 ± 0.013     | 0.008115 | ↑ |
|            | Firmicutes          | <i>Gemella</i>                                 | 0                  | 0.020 ± 0.0097    | 0.02624  | ↑ |
|            | Firmicutes          | <i>Holdemania</i>                              | 0                  | 0.014 ± 0.0044    | 0.005278 | ↑ |
|            | Firmicutes          | <i>Turicibacter</i>                            | 0                  | 0.078 ± 0.053     | 0.001348 | ↑ |
|            | Verucomicrobia      | <i>Akkermansia</i>                             | 0                  | 0.0052 ± 0.00013  | 0.008796 | ↑ |
| Day 138    | Firmicutes          | <i>uncultured_f_Ruminococcaceae</i>            | 0.74 ± .055        | 0.37 ± 0.14       | 0.01395  | ↓ |
|            | Bacteroidetes       | <i>Odoribacter</i>                             | 0.89 ± 0.39        | 0.12 ± 0.063      | 0.02787  | ↓ |
|            | Firmicutes          | <i>norank_f_Clostridiales_vadin BB60 group</i> | 0.34 ± 0.16        | 0.049 ± 0.019     | 0.0372   | ↓ |
|            | Firmicutes          | <i>Lactococcus</i>                             | 0.27 ± 0.14        | 0.020 ± 0.016     | 0.04156  | ↓ |
|            | Bacteroidetes       | <i>Bacteroides</i>                             | 2.09 ± 1.01        | 8.37 ± 1.98       | 0.02891  | ↑ |
|            | Firmicutes          | <i>Ruminococcaceae UCG-014</i>                 | 0.35 ± 0.075       | 3.81 ± 0.69       | 0.009553 | ↑ |
|            | Firmicutes          | <i>Marvinbryantia</i>                          | 0.27 ± 0.033       | 4.58 ± 0.79       | 0.003267 | ↑ |
|            | Proteobacteria      | <i>Desulfovibrio</i>                           | 0.0084 ± 0.0036    | 0.014 ± 0.0025    | 0.006249 | ↑ |
|            | Firmicutes          | <i>Butyricimonas</i>                           | 0                  | 0.045 ± 0.019     | 0.01423  | ↑ |
|            | Verucomicrobia      | <i>Akkermansia</i>                             | 0                  | 0.0035 ± 0.00039  | 0.03547  | ↑ |
| Firmicutes | <i>Turicibacter</i> | 0                                              | 0.0066 ± 0.0034    | 0.02583           | ↑        |   |
| Day 178    | Proteobacteria      | <i>Parasutterella</i>                          | 1.78 ± 0.86        | 0.13 ± 0.088      | 0.02929  | ↓ |
|            | Bacteroidetes       | <i>Odoribacter</i>                             | 0.56 ± 0.23        | 0.078 ± 0.043     | 0.02335  | ↓ |
|            | Bacteroidetes       | <i>Unclassified o_Bacteroidales</i>            | 0.48 ± 0.19        | 0.12 ± 0.047      | 0.0359   | ↓ |
|            | Firmicutes          | <i>Bacillus</i>                                | 0.059 ± 0.021      | 0.0084 ± 0.0034   | 0.01566  | ↓ |
|            | Proteobacteria      | <i>Pseudomonas</i>                             | 0.022 ± 0.0034     | 0.0027 ± 0.0046   | 0.004288 | ↓ |
|            | Firmicutes          | <i>Carnobacterium</i>                          | 0.016 ± 0.0081     | 0                 | 0.02795  | ↓ |
|            | Firmicutes          | <i>Exiguobacterium</i>                         | 0.0079 ± 0.0046    | 0                 | 0.04054  | ↓ |
|            | Firmicutes          | <i>Ruminococcaceae UCG-014</i>                 | 0.83 ± 0.12        | 7.56 ± 1.51       | 0.008431 | ↑ |
|            | Firmicutes          | <i>Butyrivibrio</i>                            | 0.0091 ± 0.0059    | 4.32 ± 1.32       | 0.004812 | ↑ |
|            | Proteobacteria      | <i>Desulfovibrio</i>                           | 0.0067 ± 0.0021    | 0.011 ± 0.00081   | 0.001538 | ↑ |
|            | Firmicutes          | <i>Quinella</i>                                | 0.58 ± 0.054       | 2.01 ± 0.50       | 0.02788  | ↑ |
|            | Firmicutes          | <i>Turicibacter</i>                            | 0.0050 ± 0.0017    | 1.99 ± 0.50       | 0.002382 | ↑ |
|            | Cyanobacteria       | <i>Microcystis</i>                             | 0                  | 0.51 ± 0.16       | 0.00506  | ↑ |
|            | Cyanobacteria       | <i>norank_o_Gastranaerophilales</i>            | 0.029 ± 0.023      | 0.17 ± 0.071      | 0.02992  | ↑ |
|            | Firmicutes          | <i>Anaerovorax</i>                             | 0.0084 ± 0.011     | 0.13 ± 0.058      | 0.02597  | ↑ |
|            | Actinobacteria      | <i>Gordonibacter</i>                           | 0.016 ± 0.010      | 0.083 ± 0.038     | 0.03959  | ↑ |
|            | Firmicutes          | <i>Family XIII AD3011 group</i>                | 0.013 ± 0.014      | 0.079 ± 0.011     | 0.00317  | ↑ |
|            | Proteobacteria      | <i>Porphyrobacter</i>                          | 0                  | 0.052 ± 0.014     | 0.003051 | ↑ |
|            | Bacteroidetes       | <i>Unclassified p_Bacteroidetes</i>            | 0                  | 0.034 ± 0.014     | 0.01311  | ↑ |
|            | Firmicutes          | <i>Unclassified_f_Erysipelotrichaceae</i>      | 0.0027 ± 0.0024    | 0.018 ± 0.0070    | 0.02345  | ↑ |
|            | Proteobacteria      | <i>Bilophila</i>                               | 0.0027 ± 0.0024    | 0.010 ± 0.0021    | 0.01501  | ↑ |
|            | Verucomicrobia      | <i>Akkermansia</i>                             | 0                  | 0.00095 ± 0.00011 | 0.03528  | ↑ |
|            | Firmicutes          | <i>Turicibacter</i>                            | 0                  | 0.020 ± 0.0093    | 0.02583  | ↑ |
